# Supplementary material for: Tandem NiO–Ni(OH)2/VS2 nanosheets: a robust photocatalyst for hydrogen evolution
Source: Royal Society of Chemistry journal article supplement (doi:10.1039/d4ma00789a), 2024-01-01
Supplement: d4ma00789a1.pdf [file d4ma00789a1.pdf]

# Supplementary Materials

## **Tandem NiO-Ni(OH)<sub>2</sub>/VS<sub>2</sub> Nanosheets: A Robust Photocatalyst for Hydrogen Evolution**

Mona S. NourEldien<sup>1\*</sup>, Mostafa Y. Nassar<sup>1,2\*</sup>, Islam M. Ibrahim<sup>1</sup>, Hisham M. Aly<sup>1</sup>

<sup>1</sup>Department of Chemistry, Faculty of Science, Benha University, Benha 13518, Egypt

<sup>2</sup>Department of Chemistry, College of Science, King Faisal University, P.O. Box 400, Al-Ahsa 31982, Saudi Arabia

\*Corresponding author.

E-mail address: [mona.noureldin@fsc.bu.edu.eg](mailto:mona.noureldin@fsc.bu.edu.eg)

## S1. Optimization study of Synthesis Parameters for VS<sub>2</sub> <sup>1</sup>

To optimize the synthesis of VS<sub>2</sub>, the parameters of temperature, reaction time, and precursor molar ratio were systematically varied. The synthesis conditions were adjusted according to the following formula:

$$\text{Yield or property} = f(T_s, t_s, R)$$

where  $f$  represents a function. This function depends on the variables ( $T_s$ ,  $t_s$ , and  $R$ ).  $T_s$  denotes the synthesis temperature in °C,  $t_s$  represents the synthesis time in hours, and  $R$  signifies the precursor molar ratio. The exact form of ( $f$ ) would be determined through experimental data that maximizes the desired material property being investigated, such as achieving a small crystallite size with a fully layered hexagonal crystal structure of VS<sub>2</sub>. Detailed experimental conditions are discussed in **Fig. S1**.

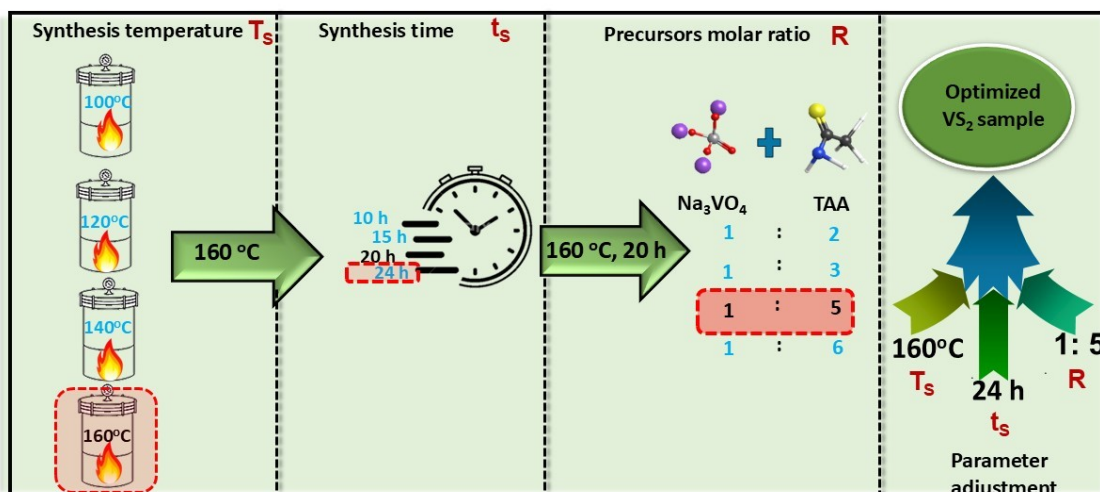

**Fig. S1** Schematic procedures for optimal VS<sub>2</sub> synthesis.

### S1.1 The impact of synthesis conditions on the particle size of VS<sub>2</sub>

### a) Optimization concerning reaction temperature

The XRD patterns in **Fig. S2a** illustrate the impact of temperature on the samples categorized by temperature group. Temperature is crucial in determining particle size, as summarized in **Table S2**. It influences both particle growth and crystallization. **Figure S2a** shows that the XRD patterns of samples treated at reactive temperatures of 100, 120, and 140 °C were predominantly amorphous in the range of  $2\theta = 20^\circ$  to  $80^\circ$ . Notably, a distinct peak at  $2\theta = 15.6^\circ$  is visible in these samples, corresponding to the (0 0 1) lattice plane of VS<sub>2</sub> nanosheets. Upon increasing the hydrothermal temperature to 160 °C, the XRD peak intensities for VS<sub>2</sub> became stronger, and the XRD diffraction peaks became slightly narrower, indicating the formation of larger and more crystalline VS<sub>2</sub> particles and an enhancement in crystallization. This observation suggested that hydrothermal treatment promotes the phase transition of VS<sub>2</sub> from amorphous to crystalline. The optimal XRD results are obtained at 160 °C.

### b) Optimization concerning reaction time

**Figure S2b** displays the XRD patterns of Time-group samples of VS<sub>2</sub> synthesized at 160 °C. Time significantly impacts particle size, as evidenced by **Table S2**. The results demonstrated that extending hydrothermal treatment results in enhanced peak intensities and a more defined (0 1 1) plane diffraction peak of VS<sub>2</sub> at  $2\theta = 35.6^\circ$ . This pattern signified an increase in the average crystalline sizes and the overall crystallinity of VS<sub>2</sub> with longer treatment times, which was attributed to the facilitation of Ostwald ripening <sup>2</sup>. The optimal XRD results were observed with a reaction time of 24 hours.

### c) Optimization concerning molar ratio of precursors

The results from the Ratio-group samples of VS<sub>2</sub> are illustrated in **Fig. S2c**, with the particle size variation detailed in **Table S2**. At a molar ratio of 1: 3, only one peak appeared at  $2\theta = 15.6^\circ$  corresponding to the (0 0 1) lattice plane of VS<sub>2</sub> NSs. Increasing the molar ratio to 1: 4 revealed the presence of a peak for the (0 1 1) plane, indicating VS<sub>2</sub> NSs growth. Subsequent increases to molar ratios of 1: 5 and 1: 6 resulted in sharper and more intense peaks, with additional peaks at  $2\theta = 57.1^\circ$ ,  $69.4^\circ$ , and  $69.2^\circ$  corresponding to complete hexagonal layered VS<sub>2</sub> NSs. It is reasonable that higher V<sup>4+</sup>: S<sup>2-</sup> molar ratios lead to smaller particle sizes, attributed to a reduction in reactive velocity due to decreased effective precursor concentrations <sup>3</sup>. Although the 1: 6 molar ratio resulted in a larger particle size than 1: 5, it might be attributed to excessive nucleation, leading to less uniform aggregated particles, reducing the available surface area and overall efficiency <sup>4</sup>.

So, the optimal VS<sub>2</sub> sample was achieved through a hydrothermal reaction involving Na<sub>3</sub>VO<sub>4</sub> and TAA at 160 °C for 20 hours, with a molar ratio of 1: 5, resulting in a fully formed VS<sub>2</sub> with a layered hexagonal nanosheet structure.

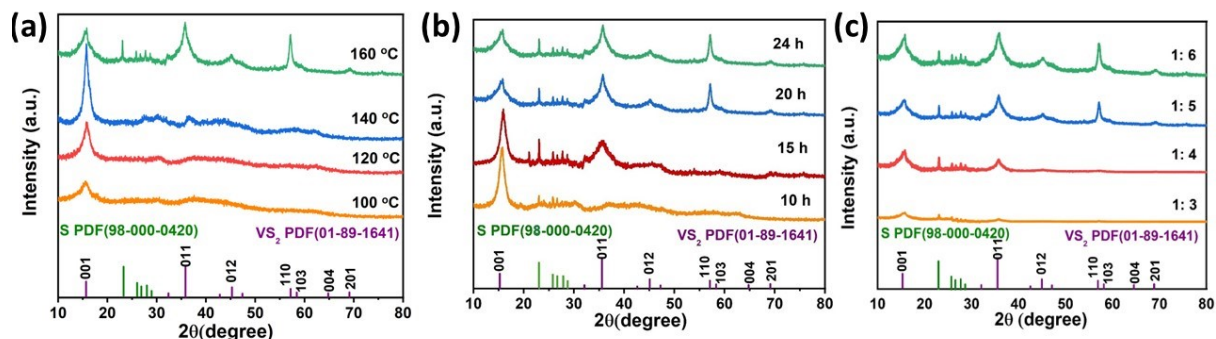

**Fig. S2** XRD spectra of VS<sub>2</sub> samples (a)Temperature-group, (b) Time-group, and (c) Ratio-group.

**Table S1** The average crystallite size (D) of VS<sub>2</sub> samples synthesized at different parameters.

| Group                     | Parameters                   |        |        |        |
|---------------------------|------------------------------|--------|--------|--------|
| Temperature-group samples | 100 °C                       | 120 °C | 140 °C | 160 °C |
| $T_s$                     | Avg. Crystallite size D (nm) |        |        |        |
|                           | 3.57                         | 3.46   | 7.19   | 20.98  |
| Time-group samples        | 10 h                         | 15 h   | 20 h   | 24 h   |
| $t_s$                     | Avg. Crystallite size D (nm) |        |        |        |
|                           | 6.06                         | 11.41  | 20.73  | 20.98  |
| Ratio-group samples       | 1: 3                         | 1: 4   | 1: 5   | 1: 6   |
| R                         | Avg. Crystallite size D (nm) |        |        |        |
|                           | 7.03                         | 12.7   | 20.98  | 24.34  |

## S1-2 The impact of synthesis conditions on the morphological properties of VS<sub>2</sub>

To provide a comparison of VS<sub>2</sub> morphology, SEM images of one sample from each synthesized group are shown in Fig. S3. These images reveal that the nanosheet structure of VS<sub>2</sub>, particularly arranged in a nanoflower shape, is not evident in the selected non-optimized samples.

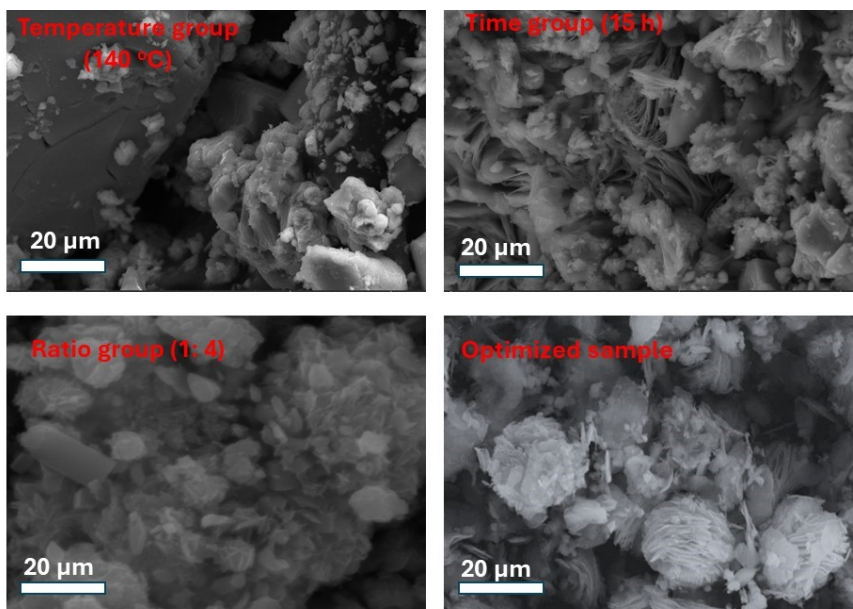

**Fig. S3** Comparison of the morphology of selected as-prepared VS<sub>2</sub> samples via SEM analysis.

**Table S2** Lattice spacing (hkl) and average crystallite size (D) of pristine and supported VS<sub>2</sub> samples

| Lattice planes | VS <sub>2</sub> | VN0.2 | VN0.4 | VN0.6 | VN0.8 |
|----------------|-----------------|-------|-------|-------|-------|
|----------------|-----------------|-------|-------|-------|-------|

| (hkl)                               |     | VN1    |       |       |       |       |       |
|-------------------------------------|-----|--------|-------|-------|-------|-------|-------|
| <b>'d' spacing</b>                  |     |        |       |       |       |       |       |
| <b>(nm)</b>                         | 001 | 0.5755 | 0.581 | 0.578 | 0.579 | 0.581 | 0.581 |
|                                     | 002 | 0.283  | 0.283 | 0.284 | 0.283 | 0.281 | 0.282 |
|                                     | 011 | 0.251  | 0.251 | 0.252 | 0.252 | 0.252 | 0.251 |
|                                     | 012 | 0.2003 | 0.201 | 0.202 | 0.201 | 0.201 | 0.201 |
|                                     | 110 | 0.1611 | 0.161 | 0.161 | 0.160 | 0.162 | 0.161 |
|                                     | 004 | 0.141  | 0.140 | 0.140 | 0.141 | 0.140 | 0.141 |
|                                     | 103 | 0.1581 | 0.159 | 0.159 | 0.159 | 0.159 | 0.159 |
|                                     | 201 | 0.1356 | 0.136 | 0.136 | 0.136 | 0.136 | 0.136 |
| <b>Avg. Crystallite size D (nm)</b> |     | 20.98  | 20.58 | 21.42 | 19.25 | 17.57 | 17.6  |

**Table S3** Current densities and peak-to-peak ( $\Delta E_{PP}$ ) potential differences of pristine  $VS_2$  and VN0.8.

| <b>Sample</b> | <b><math>I_{d \text{ anodic}}</math> (mA.g<sup>-1</sup>)</b> | <b><math>E_{\text{anodic}}</math> (V)</b> | <b><math>E_{\text{cathodic}}</math> (V)</b> | <b><math>\Delta E_{PP}</math> (V)= <math>E_a - E_c</math></b> |
|---------------|--------------------------------------------------------------|-------------------------------------------|---------------------------------------------|---------------------------------------------------------------|
| $VS_2$        | 353                                                          | 0.756                                     | 0.726                                       | 0.03                                                          |
| VN0.8         | 466                                                          | 0.726                                     | 0.646                                       | 0.08                                                          |

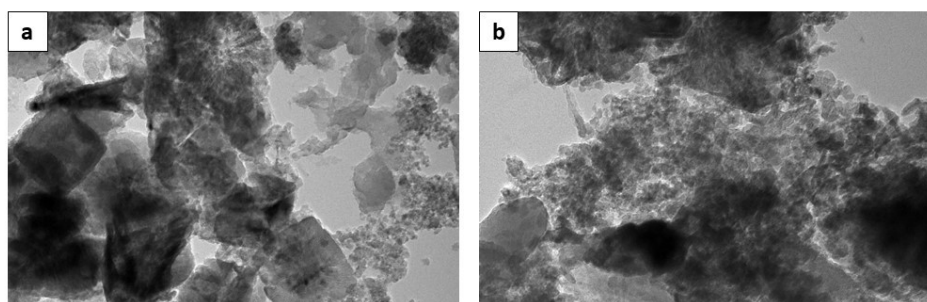

**Fig. S4** TEM images for VN0.8 material; (a) before, and (b) after recycling in photocatalytic HER.

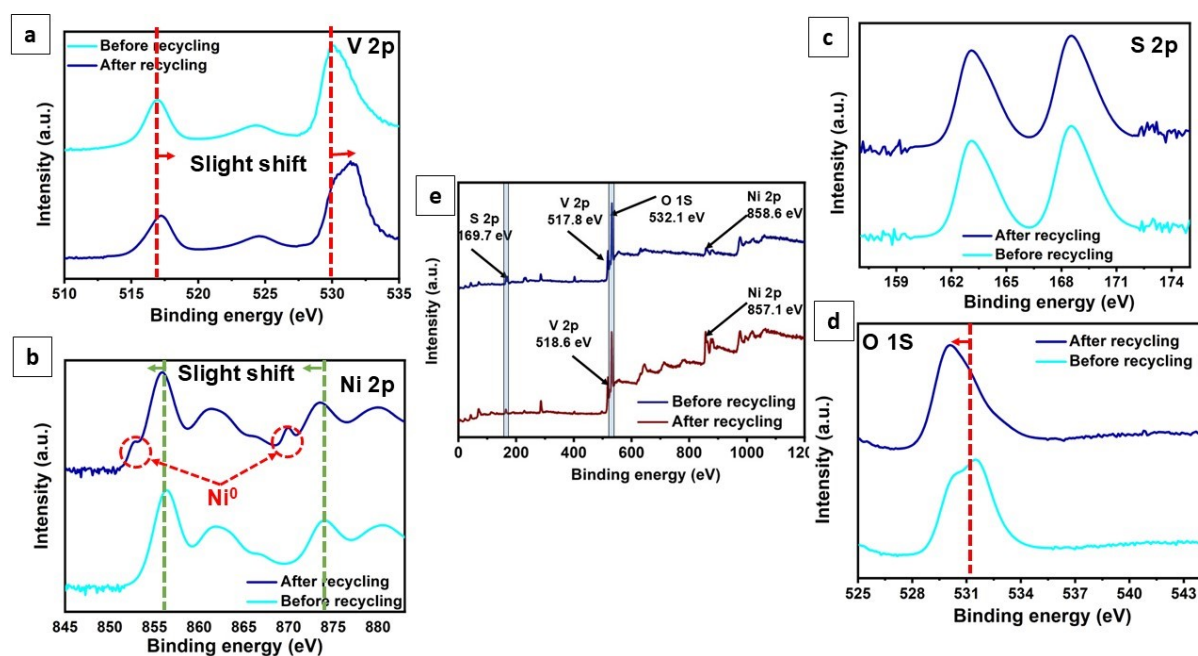

**Fig. S5** XPS spectra: (a) V 2p, (b) Ni 2p, (c) S 2p, (d) O 1s, and (e) survey spectrum of VN0.8 before and after recycling in photocatalytic HER.

1. M. S. NourEldien, M. Y. Nassar, I. M. Ibrahim and H. M. Aly, *Benha j. appl. sci.*, 2024, **9**, 1-7.

2. J. D. Ng, B. Lorber, J. Witz, A. Théobald-Dietrich, D. Kern and R. Giegé, *J. Cryst. Growth*, 1996, **168**, 50-62.
3. H. Li, H.-z. Wu and G.-x. Xiao, *Powder Technol.*, 2010, **198**, 157-166.
4. S.-J. Lee, H. Lee, K.-J. Jeon, H. Park, Y.-K. Park and S.-C. Jung, *Nanoscale Res. Lett.*, 2016, **11**, 1-8.
